# Supplementary material for: Obatoclax and LY3009120 Efficiently Overcome Vemurafenib Resistance in Differentiated Thyroid Cancer
Source: PubMed Central journal article supplement — Theranostics. 2017 Feb 23;7(4):987–1001. doi: 10.7150/thno.17322 (PMC5381260; doi:10.7150/thno.17322), 2017-02-23
Supplement: thnov07p0987s1.pdf [file thnov07p0987s1.pdf]

## Supplemental Materials

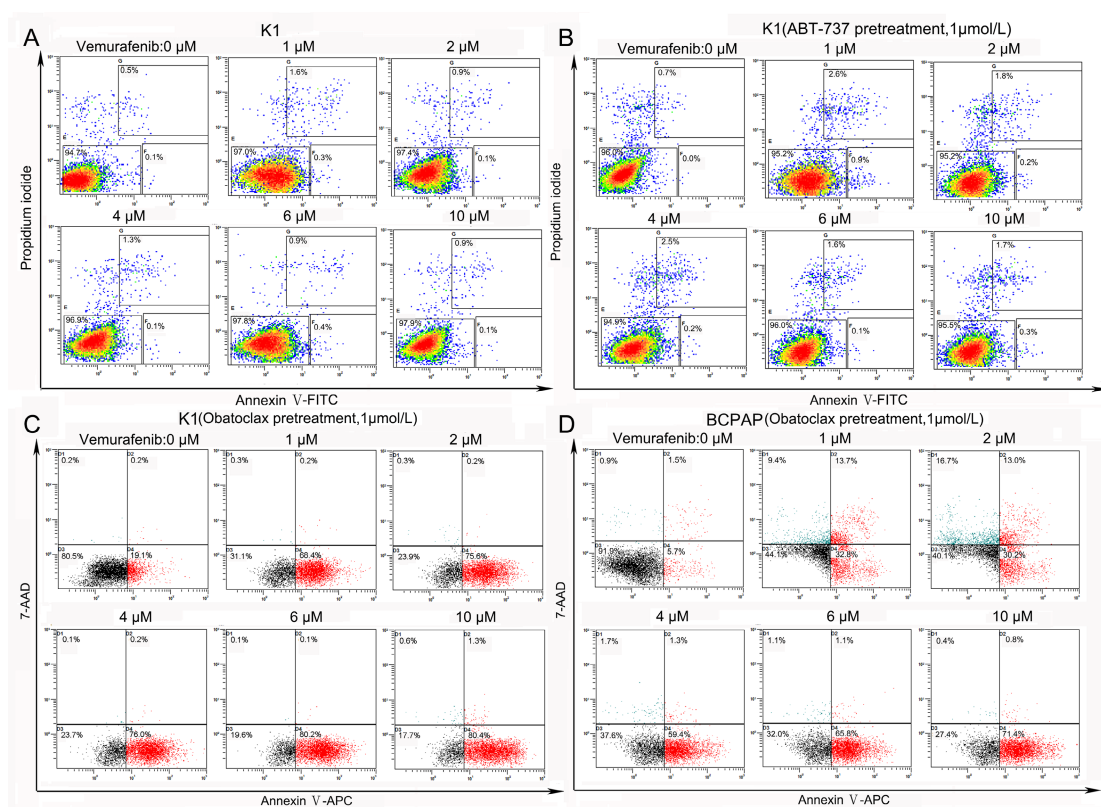

**Supplemental figure 1:** Obatoclox pretreatment, but not ABT-737 pretreatment, sensitized DTC cells to the cytotoxicity of Vemurafenib. (A, B) Flow cytometric apoptosis analyses of the impact of single agent Vemurafenib or combination of Vemurafenib and ABT-737 on K1 cells. (C, D) Flow cytometric apoptosis analyses of K1 cells and BCPAP cells exposed to combination therapy when cells were pretreated using 1  $\mu\text{mol/L}$  of Obatoclox for 2 h before being exposed to Vemurafenib treatment for another 24 h.

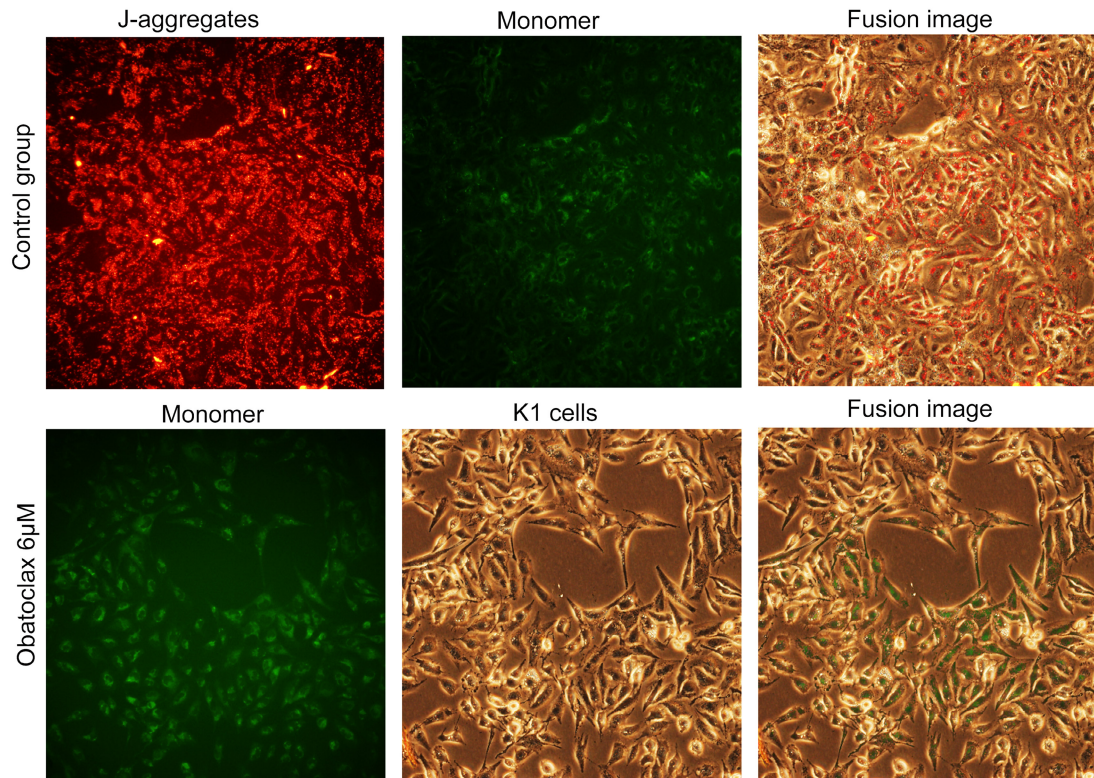

**Supplemental figure 2:** Fluorescent microscopic evaluation of MOMP in K1 cells using JC-1 following obatoclax treatment (1  $\mu\text{M}$ ) for 24 h. The upper panel showed representative images of the control group and the bottom panel displayed representative images of the Obatoclax-treated group.

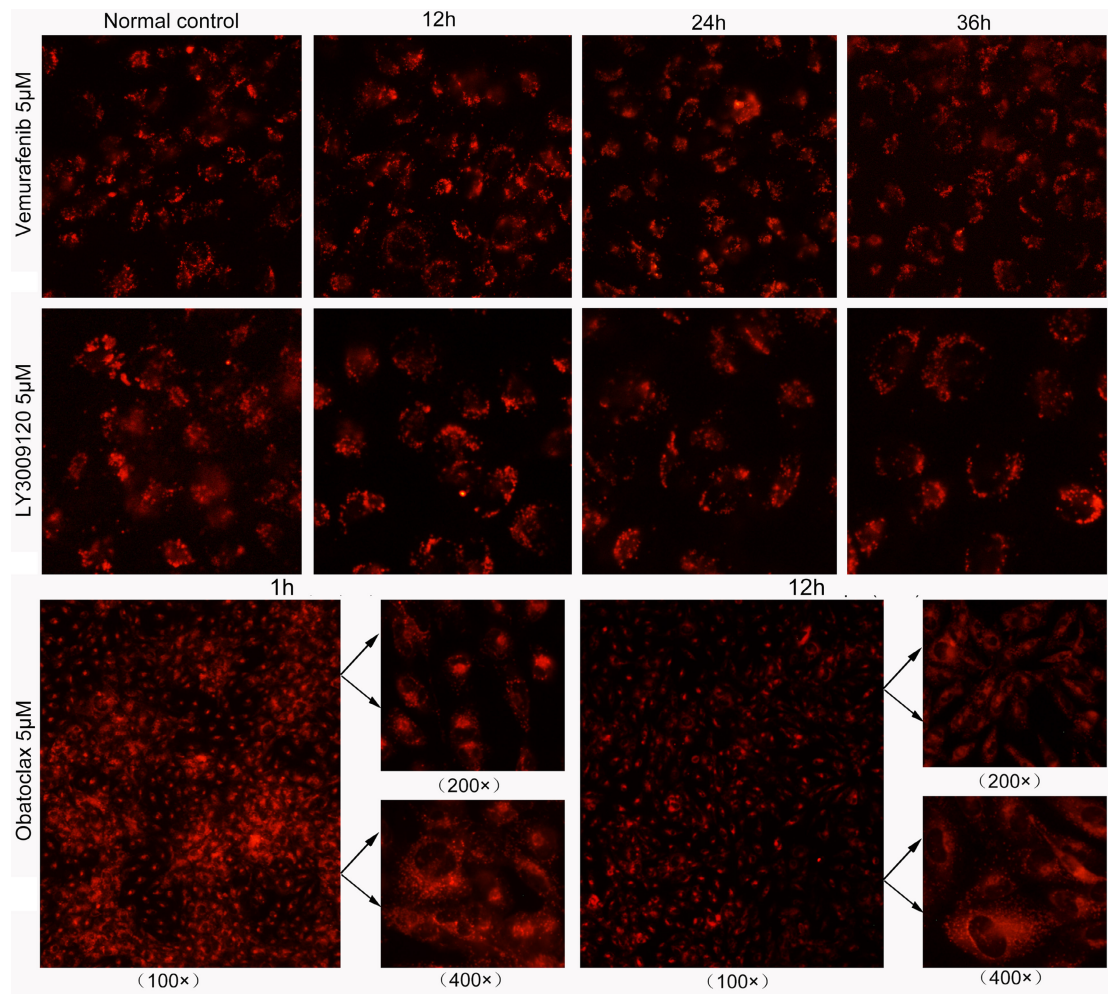

**Supplemental figure 3:** Representative fluorescent microscopic images of Red DND-99 staining. K1 cells were treated with Vemurafenib, LY3009120, or Obatoclax with indicated concentrations for different time periods. LysoTracker Red DND-99 was used for labeling and tracking acidic organelles in live K1 cells.
